# Supplementary material for: Monitoring mRNA Half-Life in Arabidopsis Using Droplet Digital PCR
Source: Plants (Basel). 2022 Oct 5;11(19):2616. doi: 10.3390/plants11192616 (PMC9571659; doi:10.3390/plants11192616)
Supplement: Supplementary file 1 [file plants-11-02616-s001.zip › TableS1.pdf]

**Table S1 : Primers used in this study.**

| <b>Gene_ID</b> | <b>Amplicon size (nt)</b> | <b>Forward primer 5'-3'</b> | <b>Reverse primer 5'-3'</b> |
|----------------|---------------------------|-----------------------------|-----------------------------|
| AT5G13180      | 185                       | AGAGCCGGTAACAAGAACGA        | GAGCTCGGCAAAAGGTTCAA        |
| AT1G13245      | 61                        | TGGAGGGAGAAGAGTCGTGA        | AGAATCAAACCCGATCCGCC        |
| AT5G15090      | 146                       | TACCTTTGATGAGCCTGCCC        | TGACAATCGGGGTAGCTGTG        |
| AT1G49850      | 121                       | CGACACCACTCACACCATCA        | GGTGAAAGAAGCGTCGGAGA        |
| AT3G21680      | 115                       | GCCTAAGACACGACAATGGC        | TCACTTTCTTCTTCCCCACGG       |
| AT2G01100      | 113                       | GCGAGGCAAATATCACAGGC        | ACTCAGCCAAACGATGCCTT        |
